# Supplementary figures and images for: A strategy using mesoporous polymer nanospheres as nanocarriers of Bcl-2 siRNA towards breast cancer therapy
Source: Royal Society of Chemistry journal article supplement (doi:10.1039/c8tb02463d), 2018-12-05

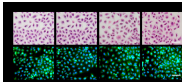

Supplement: c8tb02463d10.pdf [file c8tb02463d10.pdf]

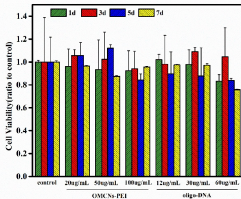

Supplement: c8tb02463d7.pdf [file c8tb02463d7.pdf]
